# Supplementary material
Source: publisher figshare collection journal article supplement (https://acs.figshare.com/ndownloader/files/15018590)
Supplement: Supplementary file 1 [file 15018590]

Supporting information for

**Differentiation of Intracellular Hyaluronidase Isoform  
by Degradable Nanoassembly Coupled with  
RNA-Binding Fluorescence Amplification**

Yuan Li,<sup>†</sup> Sheng Yang,<sup>‡,\*</sup> Lei Guo,<sup>§</sup> Yue Xiao,<sup>†</sup> Jinqiu Luo,<sup>‡</sup> Yinhui Li,<sup>†</sup> Man Shing Wong,<sup>§</sup> and Ronghua Yang<sup>†,‡,\*</sup>

<sup>†</sup> State Key Laboratory of Chemo/Biosensing and Chemometrics, College of Chemistry and Chemical Engineering, Hunan University, Changsha 410082, People's Republic of China

<sup>‡</sup> School of Chemistry and Food Engineering, Changsha University of Science and Technology, Changsha 410114, People's Republic of China

<sup>§</sup> Department of Chemistry and Institute of Molecular Functional Materials, Hong Kong Baptist University, Hong Kong SAR, People's Republic of China

\*To whom correspondence should be addressed:

*E-mail:* ysh1127@hnu.edu.cn; yangrh@pku.edu.cn

Fax: +86-731-8882 2523

|                                                 |    |
|-------------------------------------------------|----|
| 1. Materials and Instruments .....              | S4 |
| 2. Synthesis.....                               | S5 |
| 2.1 Synthesis of Chol-NH <sub>2</sub> .....     | S5 |
| 2.2 Synthesis of Chol-HA .....                  | S5 |
| 3. Examination of HA Profile.....               | S5 |
| 3.1 Gel-filtration Chromatography. ....         | S5 |
| 3.2 Measurement of HA Levels.....               | S6 |
| 4. Evaluation of CHA Loading.....               | S6 |
| 5. Cell Incubation and Cytotoxicity Assay ..... | S6 |
| 5.1 Cell Culture. ....                          | S6 |
| 5.2 Cytotoxicity Assay.....                     | S6 |
| 6. Mineralization and UV-B Irradiation .....    | S7 |
| 6.1 Mineralization. ....                        | S7 |
| 6.2 UV-B Irradiation.....                       | S7 |
| 7. Statistical Analysis .....                   | S7 |
| 8. References .....                             | S7 |
| 9. Data .....                                   | S8 |
| Scheme S1. ....                                 | S8 |
| Figure S1 .....                                 | S8 |
| Figure S2. ....                                 | S9 |
| Figure S3. ....                                 | S9 |
| Figure S4. ....                                 | S9 |

|                  |     |
|------------------|-----|
| Figure S5. ....  | S10 |
| Figure S6. ....  | S10 |
| Figure S7. ....  | S10 |
| Figure S8. ....  | S11 |
| Figure S9. ....  | S11 |
| Figure S10. .... | S11 |
| Figure S11. .... | S12 |
| Figure S12. .... | S12 |
| Figure S13. .... | S12 |
| Figure S14. .... | S13 |
| Figure S15. .... | S13 |
| Figure S16. .... | S13 |
| Figure S17. .... | S14 |
| Figure S18. .... | S14 |
| Figure S19. .... | S14 |
| Figure S20. .... | S15 |
| Figure S21. .... | S15 |
| Figure S22. .... | S15 |

## 1. Materials and Instruments

RBF was obtained from our previous synthesis. Hyaluronan acid (molecular weight: 50 kDa) from bovine vitreous humor, Hyal-1, Hyal-2, cathepsin B, trypsin, thrombin, lysozyme, ribonuclease,  $\beta$ -galactosidase, and indomethacin were purchased from commercial suppliers. Cholesteryl chloroformate and 2,2'-(Ethylenedioxy)bis(ethylamine) were purchased from Aladdin Industrial Corporation. Sephadex G-50 and interleukin (IL-1) were purchased from Sigma-Aldrich. FITC-labeled hyaluronidase (HAase) antibody was purchased from Shanghai Rui Qi Bio Technology Co., Ltd. RNase was purchased from Ambion Inc. (Austin, TX, USA). Human cervical carcinoma HeLa cell line (HeLa cell), human hepatoma carcinoma HepG2 cell line (HepG2 cell), and human normal hepatocyte cell line (L02 cell) were obtained from the cell bank of Central Laboratory at Xiangya Hospital (Changsha, China). All chemicals were of analytical grade and used as received without further purification. All solutions were prepared using sterile ultrapure water, which was obtained through a Millipore Milli-Q water purification system (Billerica, MA) and had an electric resistance  $>18.2\text{ M}\Omega$ .

UV-vis absorption spectra were recorded using a Hitachi U-4100 UV/Vis spectrophotometer (Kyoto, Japan) in 1 cm path length quartz cuvettes. Zeta potential and dynamic light scattering (DLS) were obtained from Zetasizer Nano-ZS90 (Malvern Instruments, Southborough, MA) with a 15 mV solid state laser operated at a wavelength of 635 nm. Transmission electron microscopy (TEM) images were obtained with a JEOL-3010 using an accelerating voltage of 100 kV. Fourier transform infrared (FT-IR) spectra were obtained from a TENSOR 27 spectrometer (Bruker Instruments Inc., Germany). The pH was measured with a Mettler-Toledo Delta 320 pH meter. UV-B irradiation was performed by an UV-irradiator (Biosun, Vilber-Lourmat). Total RNA and DNA were extracted from HeLa cells using TRIzol (Invitrogen, Carlsbad, CA) and NP-40 (Shell Chemical Co., London, England) lysis methods according to the manufacturer's protocol, respectively. All fluorescence measurements were performed on a PTI Fluorescence System (Photo Technology

International, Birmingham, NJ). Confocal laser scanning microscopy (CLSM) images were obtained on a Fluoview TM FV 1000 (Olympus, Japan). MTT assay was obtained on a Synergy™ 2 Multi-Mode Microplate Reader (Bio-Tek, Winooski, VT). Flow cytometric analysis was performed using flow cytometer (Gallios, Beckman Coulter Inc.).

## **2. Synthesis.**

**2.1 Synthesis of Chol-NH<sub>2</sub>.** A solution of 2,2'-(ethylenedioxy)-bis-ethylamine (EDEA, 5 g) in anhydrous dichloromethane (DCM, 30 mL) containing triethylamine (TEA, 0.75 g) was added dropwise into cholesteryl chloroformate (Chol, 3.36 g) dissolved in DCM (20 mL) over 30 min under argon. After stirred overnight at 25 °C, the final mixture was concentrated in vacuo and then purified by column chromatography (CH<sub>2</sub>Cl<sub>2</sub>/MeOH, 10:1) on silica gel to give the product amino-Chol Chol-HA.

**2.2 Synthesis of Chol-HA.** HA (1 g), dried by coevaporation with toluene in vacuo, was firstly dissolved in warm anhydrous dimethyl sulfoxide (DMSO, 25 mL) using 1-ethyl-3-(3-dimethylaminopropyl) carbodiimide (EDC, 25 mg), hydroxybenzotriazole (HOBT) (23 mg), TEA (20 µL) and 4-dimethylaminopyridine (DMAP, 2.5 mg) at continuous stirring under argon. After the reaction for 4 h at 25 °C, Chol-HA (100 mg) dissolved in DMSO (2.5 mL) was then added into the reaction mixture and stirred for 48 h at 25 °C to synthesize Chol-HA.

## **3. Examination of HA Profile.**

**3.1 Gel-filtration Chromatography.** 1.0 mg/mL HA incubated with 100 µg/mL Hyal-1 and Hyal-2 for 3 h in PB buffer (10 mM, pH 5.0) at 37 °C. Then, the total solutions were applied to a Sephadex G-50 column (1.5 × 120 cm) equilibrated with PBS. The column was eluted at 7 mL/h, and 3.6 ml fractions were collected. The column fractions were assayed using the ELISA-like assay for HA. The column was calibrated using HA and HA fragments (HA100: 100 saccharide units, HA6: ~6 saccharide units, HA4: ~4 saccharide units)<sup>1</sup>.

**3.2 Measurement of HA Levels.** HA levels were measured using a modified method of ELISA-like assay.<sup>2,3</sup>

## **4. Evaluation of CHA Loading**

The amount of RBF loaded in CHA was analyzed as follows<sup>4</sup>: 0.1 mg CHA was dispersed in 1 mL PBS buffer, and sonicated for 30 min to ensure dissolution of RBF to form RBF@CHA (nanosensor). The supernatant was then collected for fluorescence measurement after complete centrifugation of the nanosensor. The fluorescence intensity of the supernatant was determined at the excitation wavelength of 458 nm and emission wavelength of 527 nm, and the concentration of RBF were obtained from a calibration curve, which was linear over the concentration of RBF from 0.2  $\mu$ M to 1.6  $\mu$ M with a correlation coefficient of  $R^2=0.97$ .

Encapsulation efficiency = (weight of RBF loaded into CHA)/(initial feeding weight of RBF).

Loading content = (weight of RBF loaded into CHA)/(weight of CHA + RBF loaded into CHA).

## **5. Cell Incubation and Cytotoxicity Assay**

**5.1 Cell Culture.** HeLa cell, HepG2 cell and L02 cell were maintained in Dulbecco's modified Eagle's medium (DMEM) which was containing 10% fetal bovine serum (FBS), 100  $\mu$ g/mL streptomycin, and 100 U/mL penicillin. The cells were cultured at 37 °C in a humidified incubator containing 5% CO<sub>2</sub> and 95% air. The medium was replenished every two days, and the cells were subcultured after reaching confluence.

**5.2 Cytotoxicity Assay.** The cytotoxicity of nanosensor was determined in cancer cell lines (HeLa) using a standard MTT assay. Briefly, 200  $\mu$ L of HeLa cell suspension was seeded in flat-bottomed 96-well plates at a density of  $1 \times 10^4$  cells/well and allowed to attach at 37 °C for 24 h. After rinsing with PBS, cells were incubated with 200  $\mu$ L of culture media containing serial concentrations of nanosensor for 24 h, which was kept in the dark for studying the dark toxicity. The cell death induced by nanosensor was evaluated by the MTT assay according to the manufacturer's

instruction. All cytotoxicity data were obtained from parallel sample measurements (n=8) and plotted as survival percentage compared to control non-treated cells vs nanosensor concentrations. The cell viability was calculated with the equation: cell viability (%) = (mean OD value of treatment group/mean OD value of control) × 100%.

## 6. Mineralization and UV-B Irradiation

**6.1 Mineralization.** Cells were induced to mineralize for 6 days by the addition of 100  $\mu$ M L-ascorbate-2-phosphate (AsAP), 10 mM  $\beta$ -glycerophosphate ( $\beta$ -GP) and 4  $\mu$ g/ml dexamethasone (Dex) to the culture medium.

**6.2 UV-B Irradiation.** HeLa cells were seeded into 35 mm confocal dish (Glass Bottom Dish) at a density of  $1 \times 10^4$  per dish and incubated at 37 °C for 24 h. Cells were washed twice with PBS. The confocal dish was irradiated with 40 mJ cm<sup>-2</sup> UV-B in PBS in an UV-B irradiator at wavelength of 312 nm for 30 min. Irradiated media was eliminated and cell layer washed twice with PBS. Cells were then incubated in DMEM for another 6 h before fluorescence imaging.

## 7. Statistical Analysis

Data was expressed as means  $\pm$  SD from at least three experiments. One-way ANOVA was used to compare the treatment effects.  $P < 0.05$  was considered to be statistically significant.

## 8. References

- 1) Lokeshwar, V. B.; O'zbek, C.; Soloway, M. S.; Block, N. L. Tumor-associated Hyaluronic Acid: A New Sensitive and Specific Urine Marker for Bladder Cancer. *Cancer Res.* **1997**, *57*, 773-777.
- 2) Fosang, A. J.; Hey, N. J.; Carney, S. L.; Hardingham, T. E. An ELISA Plate Based Assay for Hyaluronan Using Biotinylated Proteoglycan G1 Domain (HA-binding region). *Matrix* **1990**, *10*, 306-313.
- 3) Lokeshwar, V. B.; O'zbek, C.; Pham, H. T.; Wei, D.; Young, M. J.; Duncan, R. C.;

Soloway, M. S.; Block, N. L. Urinary Hyaluronic Acid and Hyaluronidase: Markers for Bladder Cancer Detection and Evaluation of Grade. *J. Urol.* **2000**, *163*, 348-356.

4) Wu, M.; Wang, Q.; Liu, X.; Liu, J. Highly Efficient Loading of Doxorubicin in Prussian Blue Nanocages for Combined Photothermal/Chemotherapy Against Hepatocellular Carcinoma. *RSC. Adv.* **2015**, *5*, 30970-30980.

## 9. Data

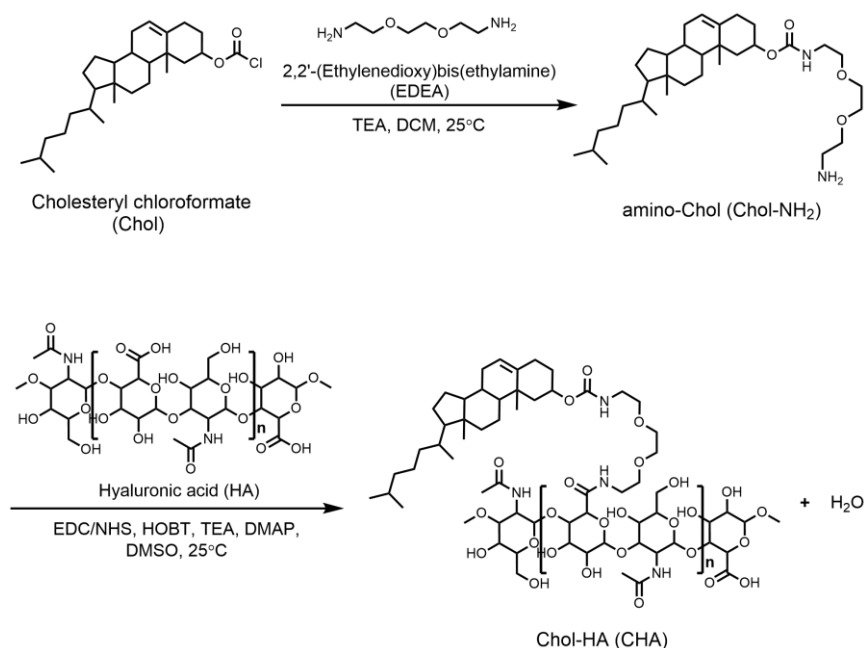

**Scheme S1.** Synthesis route of Chol-HA.

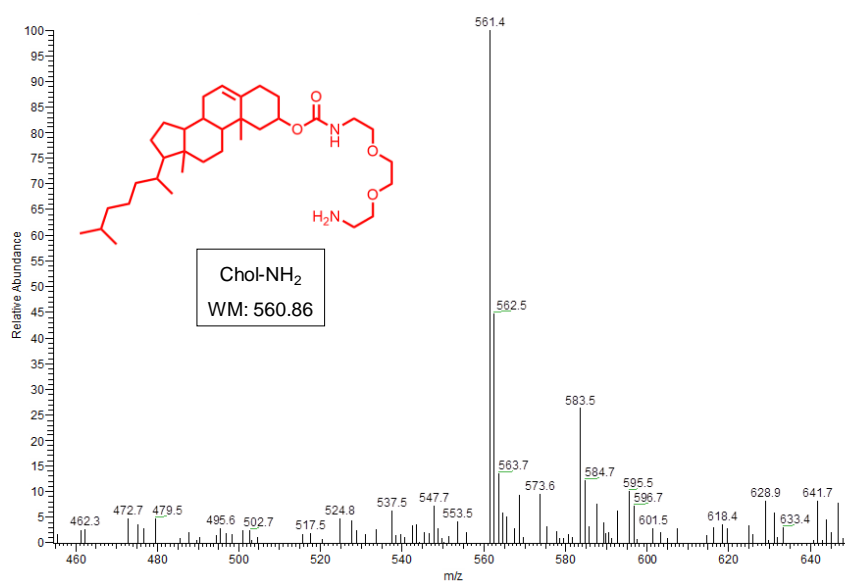

**Figure S1.** ESI-MS of Chol-NH<sub>2</sub>.



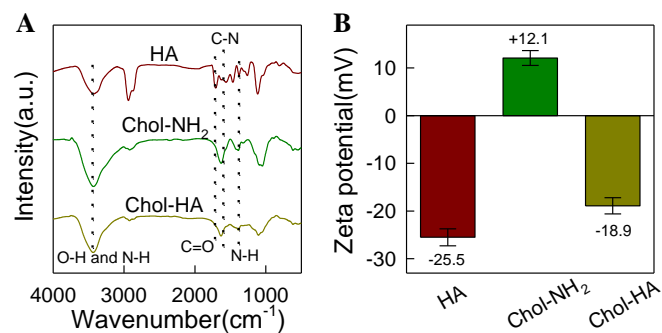

**Figure S2.** (A) FTIR and (B) zeta potentials of HA, Chol-NH<sub>2</sub>, Chol-HA.

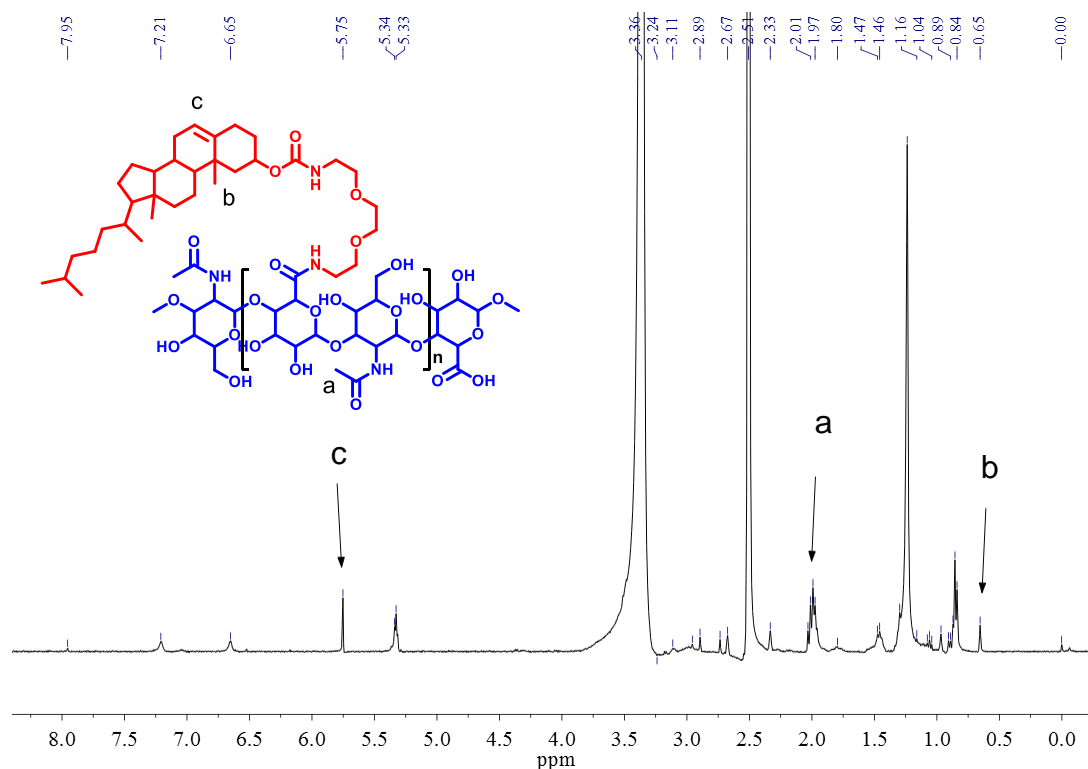

**Figure S3.** <sup>1</sup>H-NMR (500 MHz) spectrum of Chol-HA in DMSO-d<sub>6</sub>. Characteristic to HA and Chol-NH<sub>2</sub> peaks a and b were used for calculating the substitution degrees.

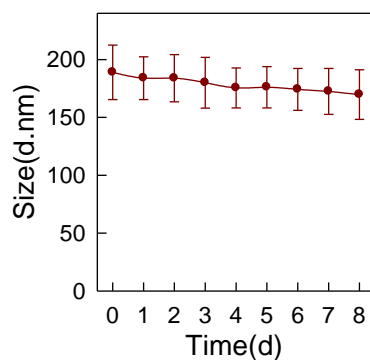

**Figure S4.** The average diameter fluctuation of nanosensor stored in buffer for different time periods. Error bars indicate s.d. (n=3).

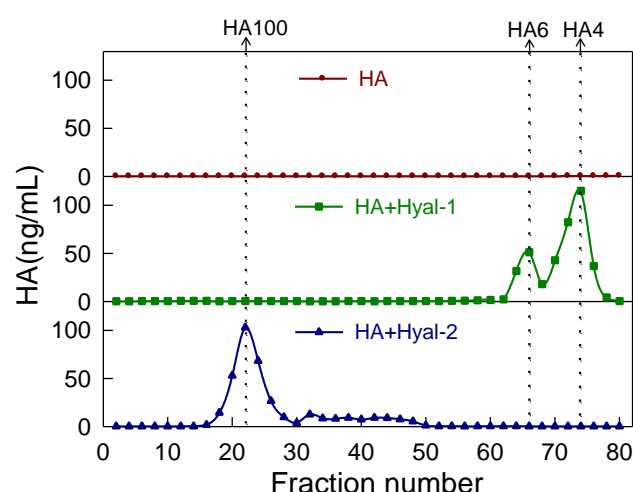

**Figure S5.** The size distributions of HA (1 mg) before and after Hyal-1 (100 µg/mL) or Hyal-2 (100 µg/mL) treatments determined by Sephadex G-50 gel-filtration chromatography.

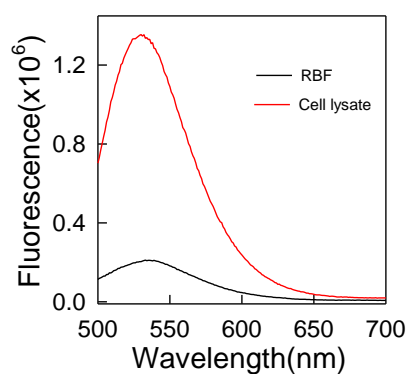

**Figure S6.** Fluorescence spectra of RBF (200 nM) in 10 mM phosphate buffer and cellular lysates from HeLa cells.  $\lambda_{\text{ex}} = 458 \text{ nm}$ .

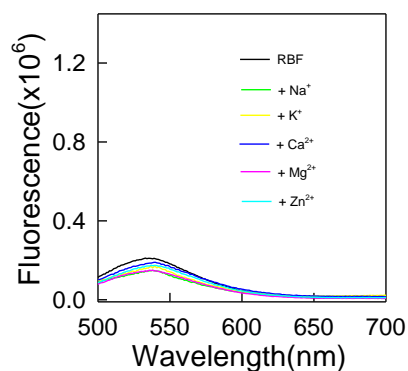

**Figure S7.** Fluorescence spectra of RBF (200 nM) in 10 mM phosphate buffer treated with 2.0 mM representative metal ions.  $\lambda_{\text{ex}} = 458 \text{ nm}$ .

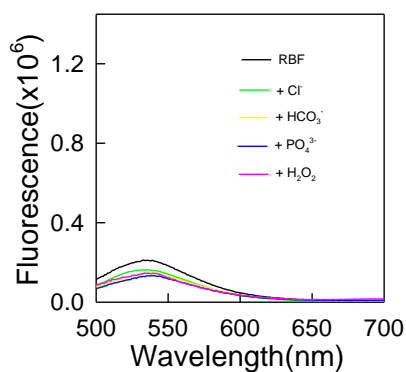

**Figure S8.** Fluorescence spectra of RBF (200 nM) in 10 mM phosphate buffer treated with 2 mM representative anions.  $\lambda_{\text{ex}} = 458 \text{ nm}$ .

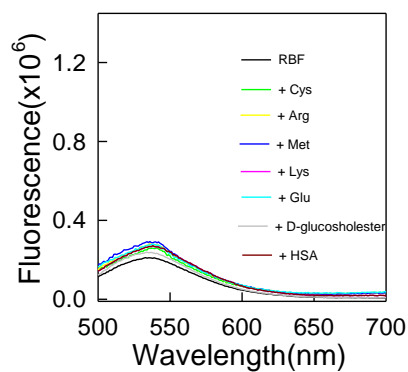

**Figure S9.** Fluorescence spectra of RBF (200 nM) in 10 mM phosphate buffer treated with 200  $\mu\text{M}$  representative amino acids, 5.0 mM glucose, and 8.0% w/v HSA.  $\lambda_{\text{ex}} = 458 \text{ nm}$ .

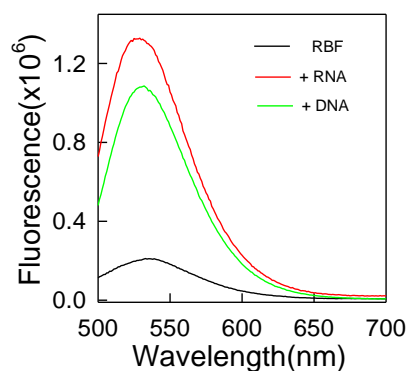

**Figure S10.** Fluorescence spectra of RBF (200 nM) in 10 mM phosphate buffer treated with 5 mg/mL nucleic acids.  $\lambda_{\text{ex}} = 458 \text{ nm}$ .

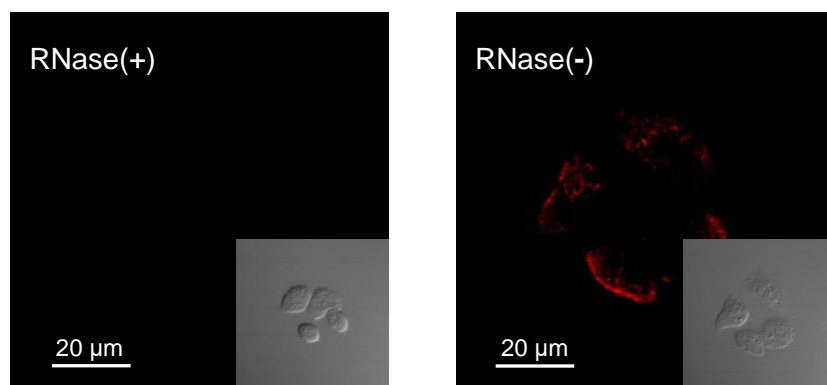

**Figure S11.** Fluorescence images of HeLa cells incubated with RBF (2.0  $\mu\text{M}$ ) in the presence and absence of RNase (5 U/mL). Bar scales: 20  $\mu\text{m}$ .

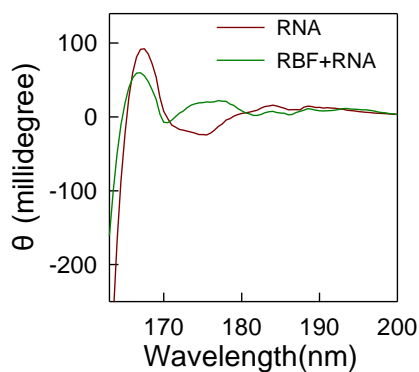

**Figure S12.** CD spectra of RNA (100  $\mu\text{g/mL}$ ) in the absence and presence of RBF (200 nM).

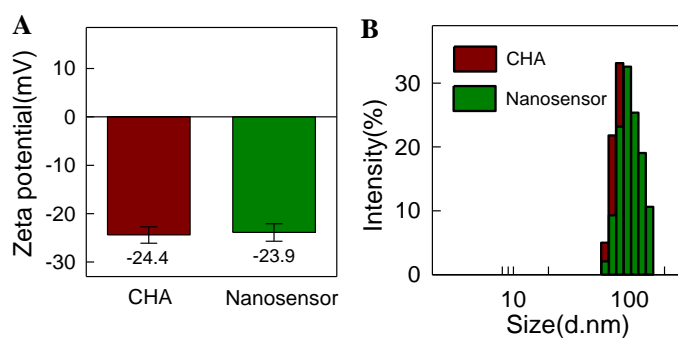

**Figure S13.** (A) Zeta potentials and (B) DLS of CHA and nanosensor.

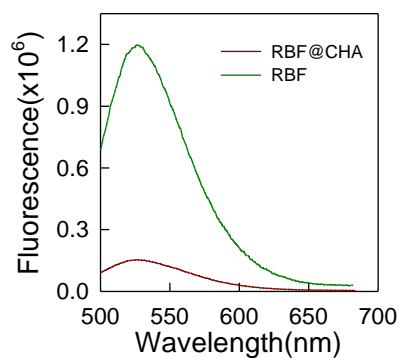

**Figure S14.** Fluorescence spectra of RBF(1.2  $\mu\text{M}$ ) and RBF@CHA(10  $\mu\text{g/mL}$ ).

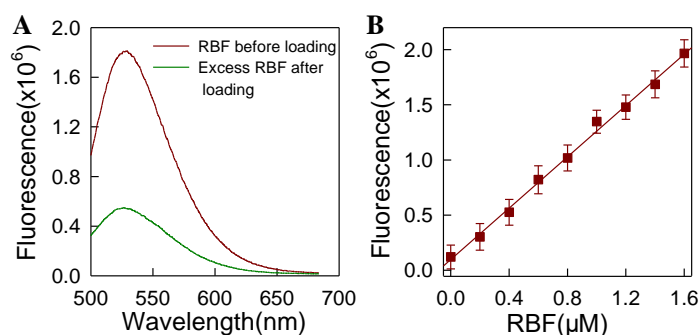

**Figure S15.** (A) Fluorescence spectra of RBF (1.5  $\mu\text{M}$ ) before and after CHA (10  $\mu\text{g/mL}$ ) loading. (B) The calibration curve of RBF from 0  $\mu\text{M}$  to 1.6  $\mu\text{M}$ . Error bars indicate s.d. (n=3).

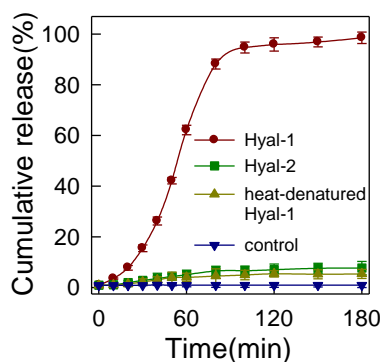

**Figure S16.** Cumulative release of nanosensor (2  $\mu\text{g/mL}$ ) before and after Hyal-1, Hyal-2, heat-denatured Hyal-1 (4  $\mu\text{g/mL}$ ) treatments at pH 5.0. Error bars indicate s.d. (n=3).

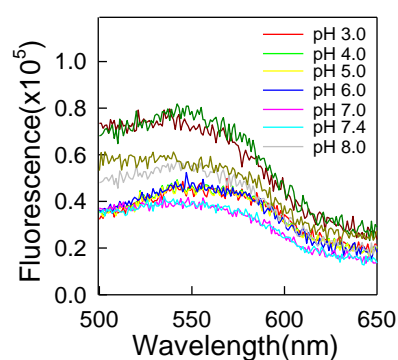

**Figure S17.** Fluorescence spectra of nanosensor (2 µg/mL) at different pH values.

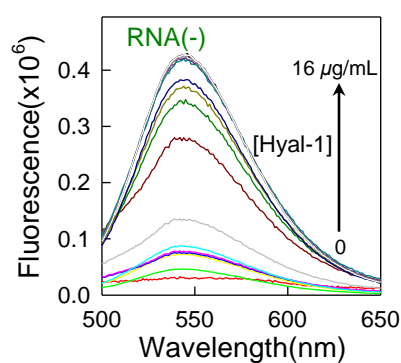

**Figure S18.** Fluorescence spectra of nanosensor (2 µg/mL) incubated with increasing concentrations of Hyal-1 ranging from 0 to 16 µg/mL in buffer solution.

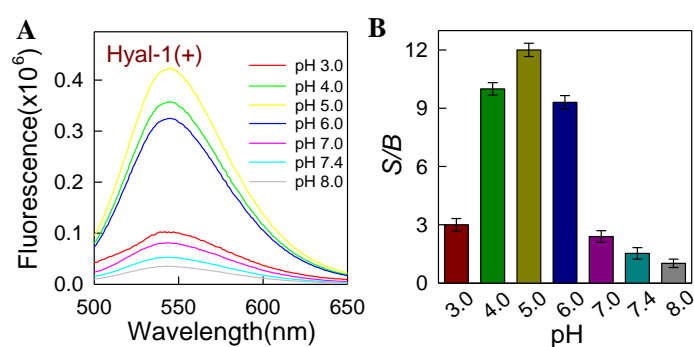

**Figure S19.** (A) Fluorescence spectra of nanosensor (2 µg/mL) incubated with Hyal-1 (10 µg/mL) at different pH values. (B) The corresponding fluorescence signals (S/B) of (A). Error bars indicate s.d. (n=3).

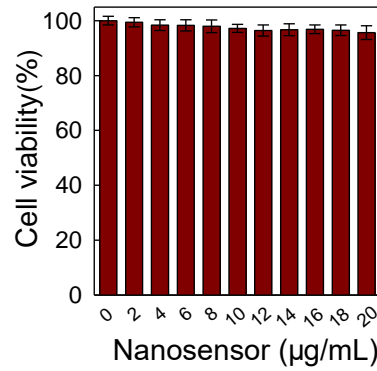

**Figure S20.** Cell viability of HeLa cells treated with different concentrations of nanosensor for 24 h. Error bars indicate s.d. (n=6).

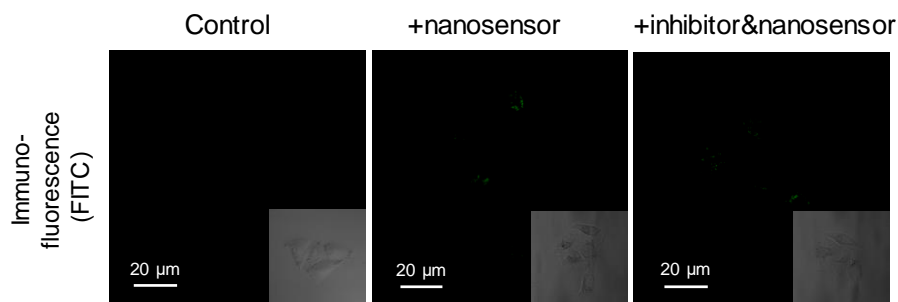

**Figure S21.** Fluorescence images of HeLa cells under different conditions: (left) free; (middle) incubation with FITC-labeled HAase antibody; (right) incubation with FITC-labeled HAase antibody in the presence of Hyal-1 inhibitor indomethacin. Scale bar: 20 μm.

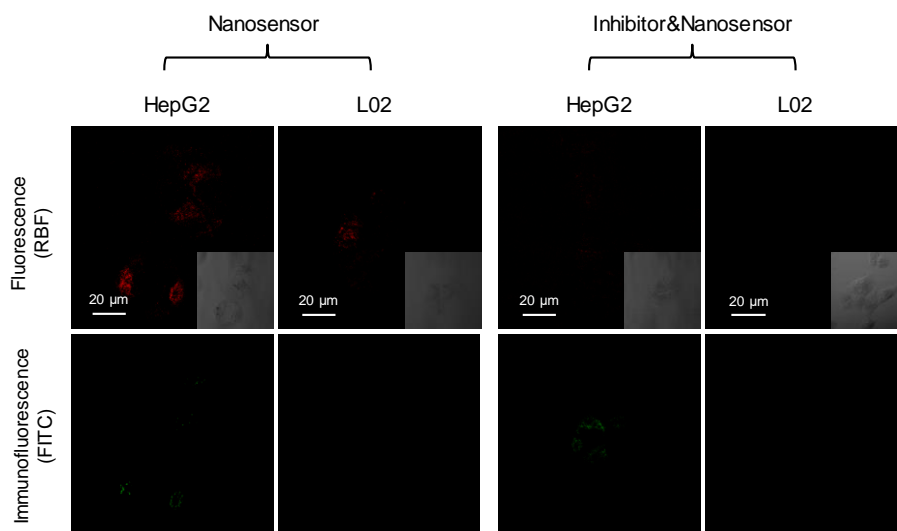

**Figure S22.** Fluorescence images of HepG2 and L02 cells after incubation with nanosensor (10 μg/mL) and FITC-labeled HAase antibody (1:200) in the absence and presence of Hyal-1 inhibitor indomethacin. Bar scales: 20 μm.
